# Supplementary material for: A unique μ8-silicate-bridged octametallic [Dy8SiO4] complex exhibiting slow magnetic relaxation
Source: Royal Society of Chemistry journal article supplement (doi:10.1039/c3ce40295a), 2013-01-01
Supplement: c3ce40295a.pdf [file c3ce40295a.pdf]

# Supporting Information

## **A unique $\mu_8$ -silicate-bridged octametallic $[\text{Dy}_8\text{SiO}_4]$ complex exhibiting slow magnetic relaxation**

Shi-Xiong She,<sup>a</sup> Mike J Zawortotko<sup>b</sup>, Wei Liu<sup>a</sup>, Zhu-Xiu Zhang<sup>b</sup> and Yahong Li<sup>\*a</sup>

---

<sup>a</sup> *Key Laboratory of Organic Synthesis of Jiangsu Province, College of Chemistry, Chemical Engineering and Materials Science, Soochow University, Suzhou 215006, China. E-mail: [liyahong@suda.edu.cn](mailto:liyahong@suda.edu.cn)*

<sup>b</sup> *Department of Chemistry, University of South Florida, CHE205, 4202 East Fowler Avenue Tampa, FL 33620-5250.*

## Experimental Section

### Materials and methods

All chemicals were used as commercially obtained without further purification. Elemental analysis for C, H, and N were carried out on a Perkin-Elmer 2400 analyzer. FTIR spectra were recorded with a Nicolet Avatar 360 FTIR spectrophotometer using the reflectance technique (4000–600  $\text{cm}^{-1}$ ). Samples were prepared as KBr disks. All magnetization data were recorded on a Quantum Design MPMS-XL-7 SQUID magnetometer. The variable-temperature magnetization was measured with an external magnetic field of 1000 Oe in the temperature range of 1.9–300 K.

### Preparation of ligand H<sub>2</sub>L

The Schiff base ligand H<sub>2</sub>L (H<sub>2</sub>L = 2-{[(2-hydroxy-3-methoxyphenyl)methylidene]amino} benzoic acid) was obtained by condensation of anthranilic acid (0.342 g, 2.5 mmol) and o-vanillin (0.384 g, 2.5 mmol) in 100 ml ethanol, applying a previously reported synthetic method.<sup>1</sup>

### Synthesis of complex 1

A mixture of Dy(NO<sub>3</sub>)<sub>3</sub>·6H<sub>2</sub>O (0.1 mmol, 45 mg), Na<sub>2</sub>SiO<sub>3</sub> (0.05 mmol, 6 mg), NaOH (0.25 mmol, 10 mg), H<sub>2</sub>L (0.25 mmol, 68 mg) and 10 mL of ethanol leads to the isolation of yellow crystals of [Dy<sub>8</sub>L<sub>8</sub>(C<sub>6</sub>H<sub>4</sub>NH<sub>2</sub>COO)<sub>4</sub>SiO<sub>4</sub>] (**1**) after heated at 75 °C for 2 days. Yield: 35%, based on the metal salt. Elemental analysis (%) calcd for C<sub>148</sub>H<sub>108</sub>Dy<sub>8</sub>N<sub>12</sub>O<sub>44</sub>Si: C, 43.50; H, 2.66; N, 4.11. Found C, 42.85; H, 2.80; N, 4.06. Selected IR data (KBr,  $\text{cm}^{-1}$ ): 1590 (s), 1541 (m), 1529 (m), 1467 (m), 1450(s), 1393 (s), 1377 (s), 1307 (m), 1245 (s), 1231 (s), 1192 (m), 1160 (m), 1099 (m), 975 (m), 929 (s), 854 (s), 770 (m), 735 (s), 719(m), 704 (s), 636 (m).

### X-ray crystallography

X-ray single crystal diffraction measurements of the title complex was carried out on a SMART CCD area detector equipped with a graphite crystal monochromator situated in the incident beam for data collection at 293(2) K. The structures were solved by direct methods and refined with full-matrix least-squares techniques using SHELXS-97 and SHELXL-97 programs.<sup>2</sup> Anisotropic thermal parameters were assigned to all non-hydrogen atoms. Data processing was accomplished with the SAINT processing program. The locations of Dy atoms were easily determined, and O, C, N atoms were subsequently determined from the difference Fourier maps. The H atoms were introduced in calculated positions and refined with fixed geometry with respect to their carrier atoms.

Crystallographic data and refinement details for **1** are summarized in Table S1. CCDC 909154 (**1**) contain the supplementary crystallographic data for this paper. These data can be obtained free of charge from the Cambridge Crystallographic Data Centre via [www.ccdc.cam.ac.uk/data\\_request/cif](http://www.ccdc.cam.ac.uk/data_request/cif).

### Reference

- 1 Fan, Y. H.; Bi, C. F.; Li, J. Y. J. *Radioanal. Nucl. Chem.* 2002, **254**, 641.
- 2 (a) Sheldrick GM (1997) SHELXS-97, Program for Crystal Structure Solution; University of Göttingen, Germany. (b) Sheldrick GM (1997) SHELXL-97, Program for Crystal Structure

Refinement; University of Göttingen, Germany.

**Table S1** Crystal data and structure refinement for complex **1**

|                                                       |                                                                                      |
|-------------------------------------------------------|--------------------------------------------------------------------------------------|
| Empirical formula                                     | C <sub>148</sub> H <sub>108</sub> Dy <sub>8</sub> N <sub>12</sub> O <sub>44</sub> Si |
| Formula weight                                        | 4086.55                                                                              |
| Temperature/K                                         | 293(2)                                                                               |
| Crystal system                                        | tetragonal                                                                           |
| Space group                                           | <i>P</i> -42 <sub>1</sub> <i>c</i>                                                   |
| <i>a</i> /Å                                           | 16.2454(5)                                                                           |
| <i>b</i> /Å                                           | 16.2454(5)                                                                           |
| <i>c</i> /Å                                           | 26.0964(9)                                                                           |
| $\alpha$ /°                                           | 90.00                                                                                |
| $\beta$ /°                                            | 90.00                                                                                |
| $\gamma$ /°                                           | 90.00                                                                                |
| Volume/Å <sup>3</sup>                                 | 6887.2(4)                                                                            |
| <i>Z</i>                                              | 2                                                                                    |
| $\rho_{\text{calc}}$ /mg/mm <sup>3</sup>              | 1.971                                                                                |
| <i>m</i> /mm <sup>-1</sup>                            | 23.621                                                                               |
| F(000)                                                | 3948.0                                                                               |
| Crystal size/mm <sup>3</sup>                          | 0.2 × 0.1 × 0.08                                                                     |
| 2 $\theta$ range for data collection                  | 6.4 to 132.44°                                                                       |
| Index ranges                                          | -17 ≤ <i>h</i> ≤ 19, -18 ≤ <i>k</i> ≤ 19, -29 ≤ <i>l</i> ≤ 30                        |
| Reflections collected                                 | 42130                                                                                |
| Independent reflections                               | 5988[R(int) = 0.1384]                                                                |
| Data/restraints/parameters                            | 5988/25/444                                                                          |
| Goodness-of-fit on F <sup>2</sup>                     | 1.072                                                                                |
| Final R indexes [ <i>I</i> ≥ 2 $\sigma$ ( <i>I</i> )] | R <sub>1</sub> = 0.0457, wR <sub>2</sub> = 0.1002                                    |
| Final R indexes [all data]                            | R <sub>1</sub> = 0.0646, wR <sub>2</sub> = 0.1098                                    |
| Largest diff. peak/hole / e Å <sup>-3</sup>           | 0.94/-0.80                                                                           |
| Flack parameter                                       | 0.005(6)                                                                             |

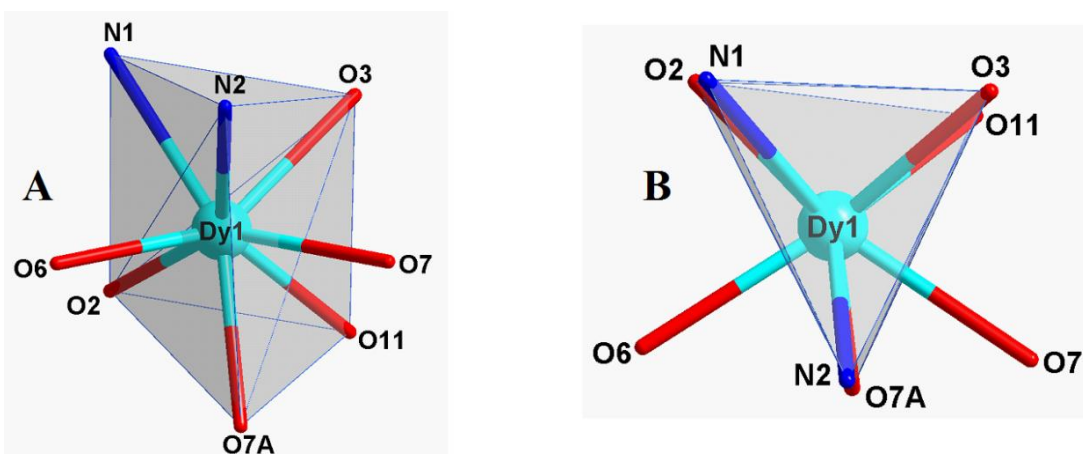

**Figure S1.** A) Side view and B) top view of the bicapped trigonal prismatic coordination environment of the Dy1 ion in complex **1**.

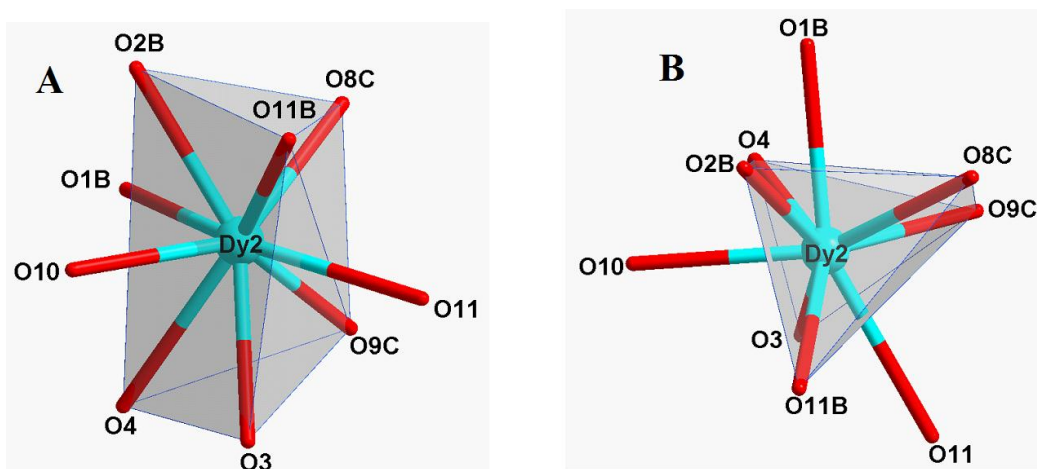

**Figure S2.** A) Side view and B) top view of the tricapped trigonal prismatic coordination environment of the Dy2 ion in complex **1**.

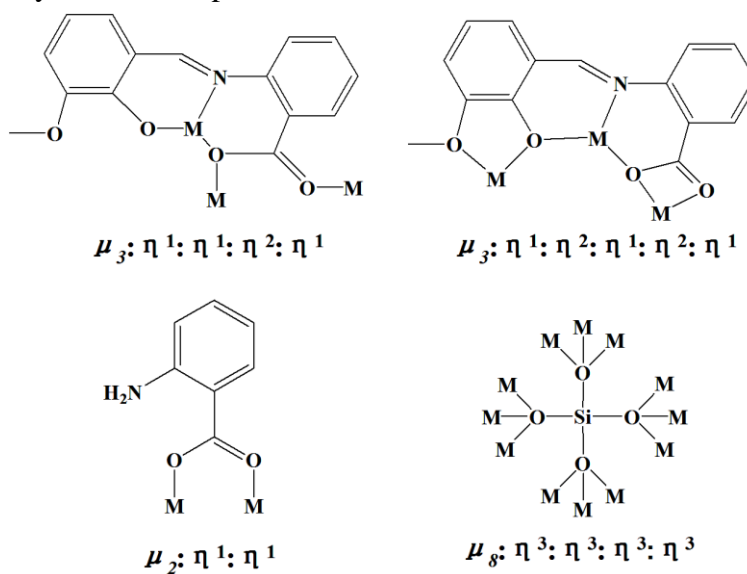

**Figure S3.** Coordination modes of the ligands present in complex **1**

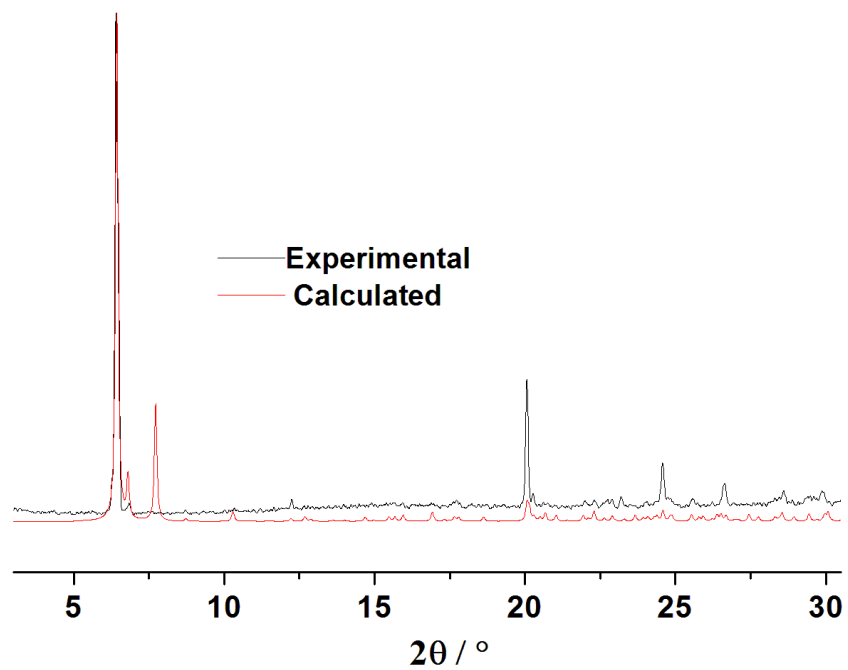

**Figure S4.** The simulated and experimental PXRD pattern of complex **1**

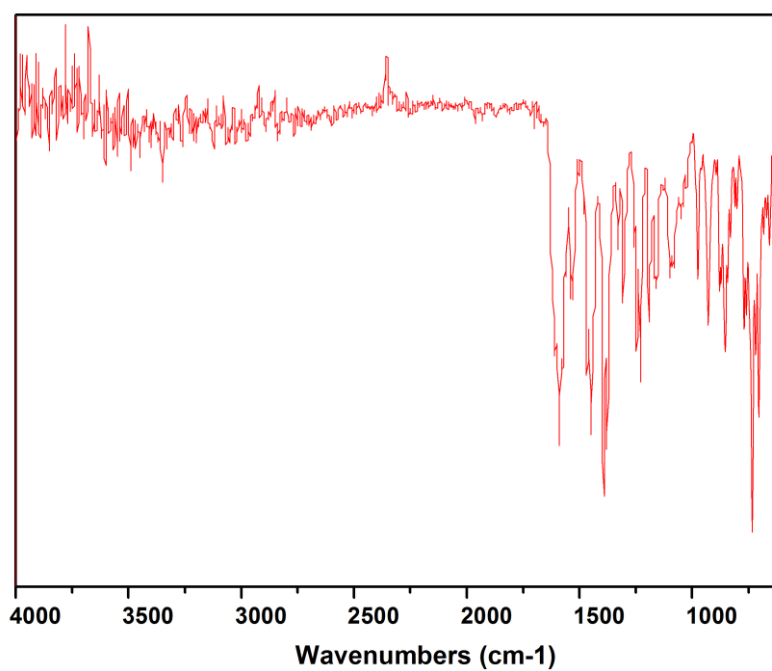

**Figure. S5** The IR spectrum of complex **1**

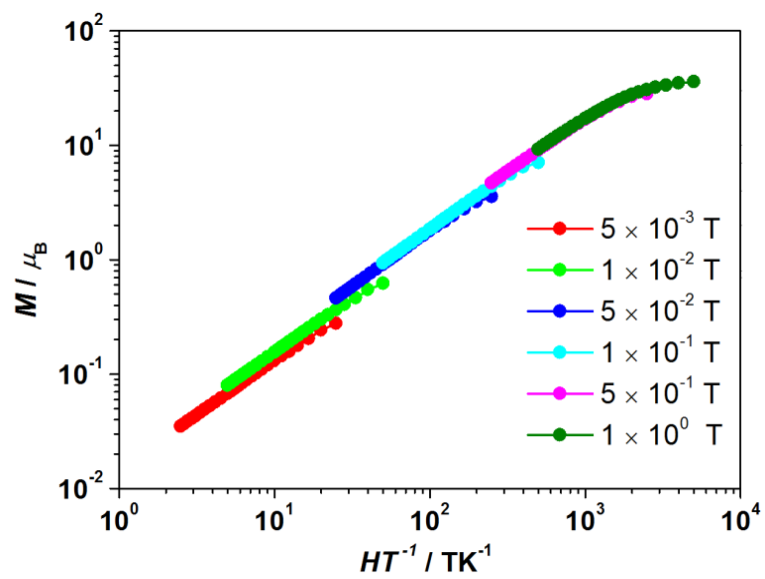

**Figure S6** Magnetization data versus  $H/T$  in different fields below 1T for **1**.

**Table S2** Selected bond lengths [Å] for complex **1**

| Atom | Atom             | Length/Å  | Atom | Atom             | Length/Å |
|------|------------------|-----------|------|------------------|----------|
| Dy1  | N1               | 2.510(8)  | Dy2  | O1 <sup>2</sup>  | 2.517(7) |
| Dy1  | O2               | 2.305(6)  | Dy2  | O2 <sup>2</sup>  | 2.426(6) |
| Dy1  | N2               | 2.565(7)  | Dy2  | O3               | 2.459(6) |
| Dy1  | O3               | 2.314(6)  | Dy2  | O4               | 2.667(7) |
| Dy1  | O6               | 2.207(7)  | Dy2  | O8 <sup>3</sup>  | 2.409(6) |
| Dy1  | O7               | 2.334(6)  | Dy2  | O9 <sup>3</sup>  | 2.321(6) |
| Dy1  | O7 <sup>1</sup>  | 2.413(6)  | Dy2  | O10              | 2.340(7) |
| Dy1  | O11              | 2.437(6)  | Dy2  | O11              | 2.622(6) |
| Si1  | O11              | 1.643(6)  | Dy2  | O11 <sup>2</sup> | 2.424(6) |
| Si1  | O11 <sup>2</sup> | 1.643(6)  | O2   | Dy2 <sup>3</sup> | 2.426(6) |
| Si1  | O11 <sup>1</sup> | 1.643(6)  | O7   | Dy1 <sup>1</sup> | 2.413(6) |
| Si1  | O11 <sup>3</sup> | 1.643(6)  | O8   | Dy2 <sup>2</sup> | 2.409(6) |
| O1   | C1               | 1.412(12) | O9   | Dy2 <sup>2</sup> | 2.321(6) |
| O1   | Dy2 <sup>3</sup> | 2.517(7)  | O11  | Dy2 <sup>3</sup> | 2.424(6) |

<sup>1</sup>1-X,1-Y,+Z; <sup>2</sup>1-Y,+X,1-Z; <sup>3</sup>+Y,1-X,1-Z



**Table S3** Selected angles [deg] for complex **1**

| Atom             | Atom | Atom             | Angle/°    | Atom             | Atom | Atom             | Angle/°    |
|------------------|------|------------------|------------|------------------|------|------------------|------------|
| N1               | Dy1  | N2               | 80.6(3)    | O3               | Dy2  | O1 <sup>2</sup>  | 114.9(2)   |
| O2               | Dy1  | N1               | 73.3(3)    | O3               | Dy2  | O4               | 51.0(2)    |
| O2               | Dy1  | N2               | 145.5(2)   | O3               | Dy2  | O11              | 67.17(19)  |
| O2               | Dy1  | O3               | 107.2(2)   | O8 <sup>3</sup>  | Dy2  | O1 <sup>2</sup>  | 71.8(2)    |
| O2               | Dy1  | O7 <sup>1</sup>  | 92.8(2)    | O8 <sup>3</sup>  | Dy2  | O2 <sup>2</sup>  | 71.6(2)    |
| O2               | Dy1  | O7               | 146.8(2)   | O8 <sup>3</sup>  | Dy2  | O3               | 138.9(2)   |
| O2               | Dy1  | O11              | 71.9(2)    | O8 <sup>3</sup>  | Dy2  | O4               | 124.4(2)   |
| O3               | Dy1  | N1               | 71.7(2)    | O8 <sup>3</sup>  | Dy2  | O11 <sup>2</sup> | 87.4(2)    |
| O3               | Dy1  | N2               | 85.0(2)    | O8 <sup>3</sup>  | Dy2  | O11              | 90.6(2)    |
| O3               | Dy1  | O7 <sup>1</sup>  | 133.1(2)   | O9 <sup>3</sup>  | Dy2  | O1 <sup>2</sup>  | 82.4(2)    |
| O3               | Dy1  | O7               | 76.0(2)    | O9 <sup>3</sup>  | Dy2  | O2 <sup>2</sup>  | 134.8(2)   |
| O3               | Dy1  | O11              | 72.6(2)    | O9 <sup>3</sup>  | Dy2  | O3               | 70.3(2)    |
| O6               | Dy1  | N1               | 82.4(3)    | O9 <sup>3</sup>  | Dy2  | O4               | 71.0(2)    |
| O6               | Dy1  | O2               | 81.9(2)    | O9 <sup>3</sup>  | Dy2  | O8 <sup>3</sup>  | 70.7(2)    |
| O6               | Dy1  | N2               | 72.4(3)    | O9 <sup>3</sup>  | Dy2  | O10              | 139.7(2)   |
| O6               | Dy1  | O3               | 148.1(2)   | O9 <sup>3</sup>  | Dy2  | O11 <sup>2</sup> | 131.0(2)   |
| O6               | Dy1  | O7               | 113.3(3)   | O9 <sup>3</sup>  | Dy2  | O11              | 74.8(2)    |
| O6               | Dy1  | O7 <sup>1</sup>  | 75.0(2)    | O10              | Dy2  | O1 <sup>2</sup>  | 89.0(2)    |
| O6               | Dy1  | O11              | 138.1(2)   | O10              | Dy2  | O2 <sup>2</sup>  | 71.1(2)    |
| O7 <sup>1</sup>  | Dy1  | N1               | 154.9(2)   | O10              | Dy2  | O3               | 78.1(2)    |
| O7               | Dy1  | N1               | 135.7(2)   | O10              | Dy2  | O4               | 69.8(2)    |
| O7 <sup>1</sup>  | Dy1  | N2               | 102.2(2)   | O10              | Dy2  | O8 <sup>3</sup>  | 142.6(2)   |
| O7               | Dy1  | N2               | 66.9(2)    | O10              | Dy2  | O11              | 115.2(2)   |
| O7               | Dy1  | O7 <sup>1</sup>  | 65.3(2)    | O10              | Dy2  | O11 <sup>2</sup> | 82.4(2)    |
| O7 <sup>1</sup>  | Dy1  | O11              | 74.3(2)    | O11 <sup>2</sup> | Dy2  | O1 <sup>2</sup>  | 132.3(2)   |
| O7               | Dy1  | O11              | 78.0(2)    | O11 <sup>2</sup> | Dy2  | O2 <sup>2</sup>  | 70.2(2)    |
| O11              | Dy1  | N1               | 118.7(2)   | O11 <sup>2</sup> | Dy2  | O3               | 109.0(2)   |
| O11              | Dy1  | N2               | 142.0(2)   | O11 <sup>2</sup> | Dy2  | O4               | 148.0(2)   |
| O11 <sup>1</sup> | Si1  | O11 <sup>2</sup> | 104.44(18) | O11              | Dy2  | O4               | 116.04(19) |
| O11 <sup>3</sup> | Si1  | O11 <sup>2</sup> | 120.1(4)   | O11 <sup>2</sup> | Dy2  | O11              | 61.8(3)    |
| O11              | Si1  | O11 <sup>2</sup> | 104.44(18) | Dy1              | O2   | Dy2 <sup>3</sup> | 106.6(2)   |
| O11 <sup>1</sup> | Si1  | O11 <sup>3</sup> | 104.44(18) | Dy1              | O3   | Dy2              | 114.7(2)   |
| O11 <sup>1</sup> | Si1  | O11              | 120.1(4)   | Dy1              | O7   | Dy1 <sup>1</sup> | 114.5(2)   |
| O11 <sup>3</sup> | Si1  | O11              | 104.44(18) | Dy1              | O11  | Dy2              | 105.2(2)   |
| O1 <sup>2</sup>  | Dy2  | O4               | 64.5(2)    | Si1              | O11  | Dy1              | 133.2(3)   |
| O1 <sup>2</sup>  | Dy2  | O11              | 154.9(2)   | Si1              | O11  | Dy2 <sup>3</sup> | 100.5(3)   |
| O2 <sup>2</sup>  | Dy2  | O1 <sup>2</sup>  | 62.7(2)    | Si1              | O11  | Dy2              | 93.0(2)    |
| O2 <sup>2</sup>  | Dy2  | O3               | 149.1(2)   | Dy2 <sup>3</sup> | O11  | Dy1              | 102.6(2)   |
| O2 <sup>2</sup>  | Dy2  | O4               | 113.0(2)   | Dy2 <sup>3</sup> | O11  | Dy2              | 125.8(2)   |
| O2 <sup>2</sup>  | Dy2  | O11              | 129.38(19) |                  |      |                  |            |

<sup>1</sup>1-X,1-Y,+Z; <sup>2</sup>1-Y,+X,1-Z; <sup>3</sup>+Y,1-X,1-Z
